# Supplementary material for: Technology Used to Recognize Activities of Daily Living in Community-Dwelling Older Adults
Source: MDPI journal article supplement (doi:10.3390/ijerph18010163), 2020-12-28
Supplement: s1 [file s1]

Supplementary Table S1) Details of each systems included within this review. The reference values shown here are referred to throughout the manuscript and relate to the corresponding value in the reference list.

| Reference                                                      | Year | System / Sensor Name | Recognised ADL                                               | Type of Sensor/s included | Outcome Measure          |
|----------------------------------------------------------------|------|----------------------|--------------------------------------------------------------|---------------------------|--------------------------|
| Commercial ADL recognition systems <u>not</u> used in research |      |                      |                                                              |                           |                          |
| [44]                                                           | /    | MiMonitor            | Feeding, Grooming, Mobility, Social interaction              | Door contact              | Door usage               |
|                                                                |      |                      |                                                              | Motion                    | Room movement            |
|                                                                |      |                      |                                                              | Video Camera              |                          |
| [45]                                                           | 2004 | Just Checking        | Grooming, Mobility, Social interaction                       | Door contact              | Door usage               |
|                                                                |      |                      |                                                              | Motion                    | Room movement            |
| [46]                                                           | 2013 | Canary Care          | Grooming, Mobility, Social interaction                       | Door contact              | Door usage               |
|                                                                |      |                      |                                                              | Motion                    | Room movement            |
|                                                                |      |                      |                                                              | Light                     | Room usage               |
|                                                                |      |                      |                                                              | Temperature               |                          |
| [47]                                                           | 2015 | Memo-Hub             | Feeding, Grooming, Mobility, Social interaction, TV watching | Door                      | Door usage               |
|                                                                |      |                      |                                                              | Motion                    | Room movement            |
|                                                                |      |                      |                                                              | Power consumption         | Electrical appliance use |
| [48]                                                           | 2017 | Tec-Angel            | Grooming, Mobility, Social interaction                       | Door contact              | Door usage               |
|                                                                |      |                      |                                                              | Motion                    | Room movement            |
| [49]                                                           | 2018 | Text Care            | Feeding, Grooming, Mobility, Social interaction              | Door contact              | Door usage               |
|                                                                |      |                      |                                                              | Light                     | Room usage               |
|                                                                |      |                      |                                                              | Sound                     |                          |
|                                                                |      |                      |                                                              | Temperature               |                          |
|                                                                |      |                      |                                                              | Motion                    | Room movement            |
| [50]                                                           | 2019 | Howz                 |                                                              | Door contact              | Door usage               |

|                                                                                                               |  |  |                                                                                          |                       |                          |
|---------------------------------------------------------------------------------------------------------------|--|--|------------------------------------------------------------------------------------------|-----------------------|--------------------------|
|                                                                                                               |  |  | Feeding, Grooming, Mobility,<br>Social interaction, TV usage                             | Motion                | Room movement            |
|                                                                                                               |  |  |                                                                                          | Power consumption     | Electrical appliance use |
| Commercial ADL recognition systems <u>also</u> used in research                                               |  |  |                                                                                          |                       |                          |
|                                                                                                               |  |  |                                                                                          | Door contact          | Door usage               |
|                                                                                                               |  |  |                                                                                          | Motion                | Room movement            |
|                                                                                                               |  |  |                                                                                          | Light                 | Room usage               |
|                                                                                                               |  |  |                                                                                          | Temperature           |                          |
|                                                                                                               |  |  |                                                                                          | Grid-eye              | Object interaction       |
|                                                                                                               |  |  |                                                                                          | Power consumption     | Electrical appliance use |
|                                                                                                               |  |  | Feeding, Grooming, Mobility,<br>Sleep, Social interaction,<br>Toileting                  | Door contact          | Door usage               |
|                                                                                                               |  |  |                                                                                          | Motion                | Room movement            |
| Named sensors used in research (but not as commercially available systems for the purpose of ADL recognition) |  |  |                                                                                          |                       |                          |
|                                                                                                               |  |  | Feeding, Grooming, Household,<br>Toileting                                               | Power consumption     | Electrical appliance use |
|                                                                                                               |  |  | Bed usage, Dressing, Feeding,<br>Grooming, Household,<br>Recreation, Toileting, TV Usage | RFID Tag              | Object interaction       |
|                                                                                                               |  |  | Bed usage, Feeding, Grooming,<br>Recreation, Toileting, TV<br>watching                   | Force/pressure sensor | Applied force            |
|                                                                                                               |  |  |                                                                                          | Power consumption     | Electrical appliance use |
|                                                                                                               |  |  | Feeding, Mobility, TV usage                                                              | Depth Camera          | Room movement            |
|                                                                                                               |  |  | Feeding, Household, Mobility,<br>Recreation                                              |                       | Object interaction       |

|      |      |                        |                                                                                |               |                             |
|------|------|------------------------|--------------------------------------------------------------------------------|---------------|-----------------------------|
| [20] | 2014 | SHT21P                 | Bed usage, Feeding, Grooming, Recreation, Sleep, Toileting, TV usage           | Humidity      | Room usage                  |
|      |      | DS18B20                |                                                                                | Temperature   |                             |
|      |      | AMS302                 |                                                                                | Light         |                             |
|      |      | EKMB1101111            |                                                                                | Motion        |                             |
|      |      | ADXL345                |                                                                                | Accelerometer |                             |
| [42] | 2015 | MSP430CPU              | Feeding, Grooming, Household, Mobility, Recreation, Sleep, Stair use, TV usage | Accelerometer | Wrist orientation /movement |
|      |      |                        |                                                                                | Altimeter     |                             |
|      |      |                        |                                                                                | Temperature   |                             |
|      |      | Gadgeteer FEZ Cerberus |                                                                                | Barometer     |                             |
|      |      |                        |                                                                                | Gyroscope     |                             |
| [28] | 2016 | /                      | Grooming, Household, Mobility, Toileting                                       | Light         | Water pressure              |
|      |      | MS 16A                 |                                                                                | Hydro         |                             |
| [43] | 2018 | DS90                   | Mobility, Sleep, Social interaction, Toilet use                                | Motion        | Room movement               |
|      |      | MS13E                  |                                                                                | Door contact  |                             |
| [69] | 2019 | Pandlets               | Feeding                                                                        | Video Camera  | Video Footage               |
|      |      |                        |                                                                                | Accelerometer |                             |
| [67] | 2020 | Everspring HSP02       |                                                                                | Gyroscope     | Wrist orientation/movement  |
|      |      |                        |                                                                                | Motion        |                             |

|                                                                                                                 |                    |                                  |                                                                                                      |                           |                          |
|-----------------------------------------------------------------------------------------------------------------|--------------------|----------------------------------|------------------------------------------------------------------------------------------------------|---------------------------|--------------------------|
| [68]                                                                                                            | 2020               | <u>Everspring HSM02</u>          | Feeding, Grooming, Recreation,<br>Sleep, Social interaction                                          | <u>Door Contact</u>       | <u>Door Usage</u>        |
|                                                                                                                 |                    | Aeotec ZW078 &<br>ZW096          |                                                                                                      | Power Consumption         | Electrical Appliance Use |
|                                                                                                                 |                    | <u>Panasonic<br/>EKMB1101112</u> |                                                                                                      | Motion                    | Room Movement            |
|                                                                                                                 |                    | Omron 2JCIR-BL                   |                                                                                                      | <u>Humidity</u>           | Room Usage               |
|                                                                                                                 |                    |                                  |                                                                                                      | <u>Light</u>              |                          |
|                                                                                                                 |                    |                                  |                                                                                                      | <u>Barometer</u>          |                          |
|                                                                                                                 |                    |                                  |                                                                                                      | <u>Sound</u>              |                          |
| <u>Rohm STM250J</u>                                                                                             | <u>Temperature</u> |                                  |                                                                                                      |                           |                          |
|                                                                                                                 | Door Sensor        | Door Use                         |                                                                                                      |                           |                          |
| Unnamed sensors used in research (but not as commercially available systems for the purpose of ADL recognition) |                    |                                  |                                                                                                      |                           |                          |
| [55]                                                                                                            | 2008               | /                                | Bed usage, Dressing, Feeding,<br>Grooming, Toileting,<br>Transferring                                | Motion                    | Room movement            |
| [56]                                                                                                            | 2008               | /                                | Feeding, Grooming, Recreation,<br>Sleep, Toileting                                                   | Motion                    | Room movement            |
| [57]                                                                                                            | 2010               | /                                | Feeding, Grooming, Recreation,<br>Sleep, Social interaction, TV<br>usage                             | Motion                    | Room Activity            |
| [26]                                                                                                            | 2011               | /                                | Bed usage, Feeding, Grooming,<br>Medicine, Recreation, Sleeping,<br>Social interaction, Transferring | Accelerometer             | Bed movement             |
|                                                                                                                 |                    |                                  |                                                                                                      | Door contact              | Door use                 |
|                                                                                                                 |                    |                                  |                                                                                                      | <u>Humidity</u>           | Room usage               |
|                                                                                                                 |                    |                                  |                                                                                                      | <u>Light</u>              |                          |
|                                                                                                                 |                    |                                  |                                                                                                      | Motion                    | Room movement            |
| [39]                                                                                                            | 2012               | /                                | Dressing, Feeding, Mobility,<br>Recreation, Sleep, Toileting                                         | Motion                    | Room movement            |
|                                                                                                                 |                    |                                  |                                                                                                      | Wearable<br>Accelerometer | Postural changes         |

|      |      |   |                                                                                                        |                   |                          |
|------|------|---|--------------------------------------------------------------------------------------------------------|-------------------|--------------------------|
| [37] | 2012 | / | Feeding, Grooming, Sleeping, Tv usage                                                                  | Motion            | Room movement            |
|      |      |   |                                                                                                        | Power consumption | Electrical appliance use |
| [25] | 2014 | / | Dressing, Feeding, Grooming                                                                            | Door contact      | Door usage               |
|      |      |   |                                                                                                        | Motion            | Room movement            |
|      |      |   |                                                                                                        | Power consumption | Electrical appliance use |
|      |      |   |                                                                                                        | Temperature       | Room usage               |
| [58] | 2014 | / | Grooming, Toileting                                                                                    | Motion            | Room movement            |
| [59] | 2014 | / | Feeding, Grooming, Recreation, Sleeping, Toileting                                                     | Force/Pressure    | Sitting/lying            |
|      |      |   |                                                                                                        | Motion            | Room movement            |
|      |      |   |                                                                                                        | Power consumption | Electric appliance use   |
|      |      |   |                                                                                                        | Temperature       | Room usage               |
| [60] | 2014 | / | Dressing, Feeding, Grooming, Mobility, Transferring                                                    | Accelerometer     | Bed/chair movement       |
|      |      |   |                                                                                                        | Sound             | Water usage              |
|      |      |   |                                                                                                        | Humidity          | Room usage               |
|      |      |   |                                                                                                        | Temperature       |                          |
|      |      |   |                                                                                                        | Motion            | Room movement            |
|      |      |   |                                                                                                        | Power consumption | Electrical appliance use |
|      |      |   |                                                                                                        | Door contact      | Door use                 |
|      |      |   |                                                                                                        |                   |                          |
| [61] | 2015 | / | Bed usage, Feeding, Grooming, Household, Medicine, Recreation, Sleep, Social interaction, Transferring | Door contact      | Door use                 |
| [62] | 2015 | / | Bed usage, Dressing, Feeding, Grooming, Mobility, Sleep                                                | Accelerometer     | Bed movement             |
|      |      |   |                                                                                                        | Motion            | Room movement            |
|      |      |   |                                                                                                        | Power consumption | Electrical appliance use |
|      |      |   |                                                                                                        | Door contact      | Door usage               |
|      |      |   |                                                                                                        | Temperature       | Room usage               |

|      |      |   |                                                                                     |                   |                          |
|------|------|---|-------------------------------------------------------------------------------------|-------------------|--------------------------|
| [63] | 2016 | / | Feeding, Grooming, Recreation,<br>Sleep, Social interaction,<br>Transferring        | Humidity          |                          |
|      |      |   |                                                                                     | Door contact      | Door usage               |
|      |      |   |                                                                                     | Motion            | Room activity            |
|      |      |   |                                                                                     | Light             | Room usage               |
|      |      |   |                                                                                     | Temperature       |                          |
| [64] | 2017 | / | Feeding, Recreation, Sleep, Social<br>interaction                                   | Door              | Door usage               |
|      |      |   |                                                                                     | Motion            | Room movement            |
| [10] | 2018 | / | Feeding, Grooming, Mobility,<br>Recreation, Sleep, Social<br>interaction, Toileting | Motion            | Room movement            |
| [65] | 2018 | / | Feeding, Grooming, Recreation,<br>Sleep, Toileting, TV watching                     | Force/Pressure    | Sitting/Lying            |
|      |      |   |                                                                                     | Motion            | Room activity            |
|      |      |   |                                                                                     | Power consumption | Electrical appliance use |
|      |      |   |                                                                                     | Temperature       | Room usage               |
| [66] | 2019 | / | Feeding, Grooming, Household,<br>Recreation, Sleep, Social<br>interaction           | Motion            | Room movement            |
|      |      |   |                                                                                     | Power consumption | Electrical appliance use |
